# Supplementary material for: ERK2 Is a Promoter of Cancer Cell Growth and Migration in Colon Adenocarcinoma
Source: MDPI journal article supplement (doi:10.3390/antiox13010119), 2024-01-17
Supplement: s1 [file s1]

**Supplemental Table S1.** PCR primers.

|                          |                          |
|--------------------------|--------------------------|
| Mouse DUSP5 forward      | acagaccagcctatgaccag     |
| Mouse DUSP5 reverse      | cacgggatccactttagt       |
| Mouse DUSP6 forward      | gttcctcttgagcagcatcg     |
| Mouse DUSP6 reverse      | agcatgtcctgtccttcaa      |
| Mouse DUSP7 forward      | gccaaggactctaccaacct     |
| Mouse DUSP7 reverse      | cggggaagaactgagagagg     |
| Mouse DUSP9 forward      | ccactacaagcagatcccca     |
| Mouse DUSP9 reverse      | ccaagtcgtaggcatcgtg      |
| Mouse RGL1 forward       | agctgtctgtggacaggtat     |
| Mouse RGL1 reverse       | ctgaaggcaagggaagttag     |
| Mouse RGS4 forward       | gctaaggggtgagcactctg     |
| Mouse RGS4 reverse       | tctgccctcacctaagcagt     |
| Mouse ADAP2 forward      | gtgctcctccagcaaactc      |
| Mouse ADAP2 reverse      | ctgaactgaacccccagtgt     |
| Mouse RASAL forward      | tgtagggtcacctcctggtc     |
| Mouse RASAL reverse      | ttggtcatccactttacca      |
| Mouse 18S rRNA forward   | agaaacggctaccacatcca     |
| Mouse 18S rRNA reverse   | ccctccaatggatcctcgtt     |
| Mouse ERK1 forward       | tgggccaagctctttcctaa     |
| Mouse ERK1 reverse       | agctccatgtcgaaggtagaa    |
| Mouse ERK2 forward       | ccaacaggcctatcttcca      |
| Mouse ERK2 reverse       | acctgttccatggcacctta     |
| Human ERK1 forward       | tggcaagcactacctggatcag   |
| Human ERK1 reverse       | gcagagactgtaggtagtttcggg |
| Human ERK2 forward       | gtgacctcaagccttccaac     |
| Human ERK2 reverse       | agaatgcagcctacagacca     |
| Human Oct4 forward       | gggccgagtggtgtctgta      |
| Human Oct4 reverse       | cgaggagtacagtgcagtga     |
| Human VIMENTIN forward   | gagtccactgagtaccggag     |
| Human VIMENTIN reverse   | acgagccatttctccttca      |
| Human Chi3 forward       | ttccctctaccaatgccat      |
| Human Chi3 reverse       | agggctgagctcaaattctgt    |
| Human CDX2 forward       | ggacgtgagcatgtacccta     |
| Human CDX2 reverse       | gtagccattccagtcctccc     |
| Human beta actin forward | tgcgttgacattaaggagaag    |
| Human beta actin reverse | gctcgtagctcttctcca       |
| Human 18S RNA forward    | gttggttttcggaactgagg     |
| Human 18S RNA reverse    | gcatcgtttatggcgaac       |

| CCD841         | DLD1           | HCT116          |
|----------------|----------------|-----------------|
| Amelogenin: X  | Amelogeni: X,Y | Amelogenin: X,Y |
| CSF1PO: 10,11  | CSF1PO: 1,12   | CSF1PO: 7,10    |
| D13S317: 11,13 | D13S317: 8,11  | D13S317: 10,12  |
| D16S539: 10,11 | D16S539: 12,13 | D16S539: 11,13  |
| D5S818: 12,13  | D5S818: 13     | D5S818: 10,11   |
| D7S820: 11     | D7S820: 10,12  | D7S820: 11,12   |
| TH01: 7,8      | TH01: 7,9,3    | TH01: 8,9       |
| TPOX: 9,10     | TPOX: 8,11     | TPOX: 8,9       |
| vWA: 14,18     | vWA: 18,19     | vWA: 17,22      |

**Supplemental Figure S1.** STRs of cell CCD841, DLD1, and HCT116 showing marked differences between cell lines.

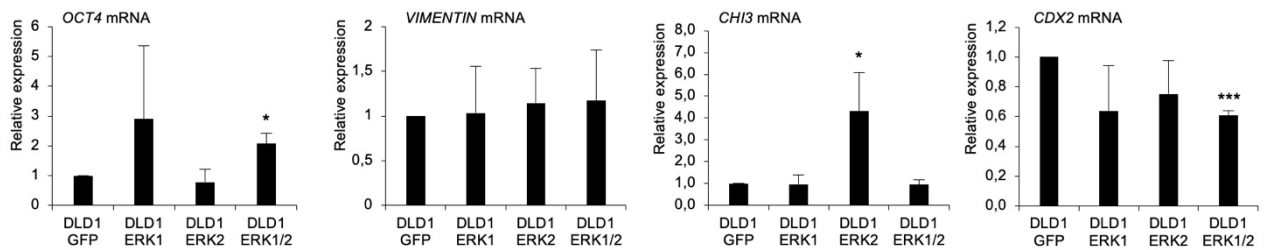

**Supplemental Figure S2.** *OCT4*, *VIMENTIN*, *CHI3*, and *CDX2* differentiation marker expression in DLD1 cells expressing *GFP*, *ERK1*, *ERK2*, or *ERK1/2*. The data did not show any effect for *ERK1* in the differentiation of the cells. The p-values are \* $p < 0.05$ , \*\* $p < 0.01$ , \*\*\* $p < 0.001$ , and \*\*\*\* $p < 0.0001$ . The p-value was determined using *GFP* expressing cells as a comparison control.
